# Supplementary material for: Simplified antibiotic regimens for treatment of clinical severe infection in the outpatient setting when referral is not possible for young infants in Pakistan (Simplified Antibiotic Therapy Trial [SATT]): a randomised, open-label, equivalence trial
Source: PubMed Central journal article supplement (PMC5250591; doi:10.1016/s2214-109x(16)30335-7), 2016-12-15
Supplement: mmc1.pdf [file mmc1.pdf]

# THE LANCET Global Health

## Supplementary appendix

This appendix formed part of the original submission and has been peer reviewed. We post it as supplied by the authors.

Supplement to: Mir F, Nisar I, Tikmani SS, et al. Simplified antibiotic regimens for treatment of clinical severe infection in the outpatient setting when referral is not possible for young infants in Pakistan (Simplified Antibiotic Therapy Trial [SATT]): a randomised, open-label, equivalence trial. *Lancet Glob Health* 2016; published online Dec 14. [http://dx.doi.org/10.1016/S2214-109X\(16\)30335-7](http://dx.doi.org/10.1016/S2214-109X(16)30335-7).

## Supplementary Table 1: Study Sites Demographics

| Demographics                                           | Study Sites   |
|--------------------------------------------------------|---------------|
| Total population                                       | 274,856       |
| Female                                                 | 129,977 (47%) |
| Female aged 15-49 years                                | 67,802 (25%)  |
| Under 5 children                                       | 39,028 (14%)  |
| Health Indicators                                      |               |
| Under 5 Mortality Rate (U5MR, per 1000 live births)    | 71.7          |
| Infant Mortality Rate (IMR, per 1000 live births)      | 62            |
| Neonatal Mortality Rate (NMR, per 1000 live births)    | 44.9          |
| Maternal Mortality Rate (MMR, per 100,000 live births) | 371           |
| % coverage DPT3 (verbal report and/or card)            | 51.6          |
| % with access to improved drinking water*              | 61            |
| % with access to improved sanitation facilities*       | 49            |

\*improved drinking water: piped household water connection located inside the user's dwelling, plot or yard

\*improved sanitation facilities: 'flush toilet' connected to pit, septic tank or sewer

**Supplementary Table 2: Antibiotic Dosage for Neonatal Sepsis Trials**

| <b>Weight band</b>                                                                                                                   | <b>Amount per dose</b> | <b>Daily dose</b> | <b>Lower Limit (mg or units /kg/d)</b> | <b>Upper Limit (mg or units /kg/d)</b> |
|--------------------------------------------------------------------------------------------------------------------------------------|------------------------|-------------------|----------------------------------------|----------------------------------------|
| <b>Gentamicin - desired range 4-5 mg/kg/day in 0-6 days and 5-6.5 mg/kg in 7-59 days (40mg/ml injection; single daily injection)</b> |                        |                   |                                        |                                        |
| 1.5-1.9 kg                                                                                                                           | 0.2 ml                 | 8 mg              | 4.2                                    | 5.3                                    |
| 2.0-2.4 kg                                                                                                                           | 0.25 ml                | 10 mg             | 4.2                                    | 5.0                                    |
| 2.5-2.9 kg                                                                                                                           | 0.3 ml                 | 12 mg             | 4.1                                    | 4.8                                    |
| 3.0-3.9 kg                                                                                                                           | 0.45                   | 18 mg             | 4.6                                    | 6.0                                    |
| 4.0-4.9 kg                                                                                                                           | 0.65                   | 26 mg             | 5.3                                    | 6.5                                    |
| 5.0-5.9 kg                                                                                                                           | 0.8                    | 32 mg             | 5.4                                    | 6.4                                    |
| <b>Procaine penicillin - desired range 40,000-60,000 units/kg/day (200,000 units/ml injection; single daily injection)</b>           |                        |                   |                                        |                                        |
| 1.5-1.9 kg                                                                                                                           | 0.4 ml                 | 80000 units       | 40201                                  | 53333                                  |
| 2.0-2.4 kg                                                                                                                           | 0.5 ml                 | 100000 units      | 40161                                  | 50000                                  |
| 2.5-2.9 kg                                                                                                                           | 0.7 ml                 | 140000 units      | 48000                                  | 56000                                  |
| 3.0-3.9 kg                                                                                                                           | 0.9 ml                 | 180000 units      | 46000                                  | 60000                                  |
| 4.0-4.9 kg                                                                                                                           | 1.1 ml                 | 220000 units      | 45000                                  | 55000                                  |
| 5.0-5.9 kg                                                                                                                           | 1.4 ml                 | 280000 units      | 47500                                  | 56000                                  |
| <b>Amoxicillin - desired range 75-100 mg/kg/day (25mg/ml (125mg/5ml); twice daily orally)*</b>                                       |                        |                   |                                        |                                        |
| 1.5-1.9 kg                                                                                                                           | 3.0 ml                 | 150 mg            | 75.4                                   | 100.0                                  |
| 2.0-2.4 kg                                                                                                                           | 4.0 ml                 | 200 mg            | 80.3                                   | 100.0                                  |
| 2.5-2.9 kg                                                                                                                           | 5.0 ml                 | 250 mg            | 83.6                                   | 100.0                                  |
| 3.0-3.9 kg                                                                                                                           | 6.0 ml                 | 300 mg            | 75.2                                   | 100.0                                  |
| 4.0-4.9 kg                                                                                                                           | 8.0 ml                 | 400 mg            | 80.2                                   | 100.0                                  |
| 5.0-5.9 kg                                                                                                                           | 10.0 ml                | 500 mg            | 83.5                                   | 100.0                                  |

**Supplementary Table 3: Blueprint for blood culture results interpretation on per protocol infants**

|                                                                                                                                                                                                                                                                                                                                                                                                                                                                                                                                                                                                                                                                            |
|----------------------------------------------------------------------------------------------------------------------------------------------------------------------------------------------------------------------------------------------------------------------------------------------------------------------------------------------------------------------------------------------------------------------------------------------------------------------------------------------------------------------------------------------------------------------------------------------------------------------------------------------------------------------------|
| <b>Pathogens traditionally ‘known’ to be associated with young infant sepsis in literature:</b>                                                                                                                                                                                                                                                                                                                                                                                                                                                                                                                                                                            |
| E.coli, Klebsiella spp, Salmonella spp, Shigella spp, other Enterobacteriaceae, Pseudomonas aeruginosa, Staphylococcus aureus, Staphylococcus lugdunensis, Streptococcus pyogenes, Streptococcus agalactiae, Streptococcus pneumoniae, Burkholderia cepacia, Stenotrophomonas maltophilia, Haemophilus influenzae, Streptococcus bovis, Listeria monocytogenes, Neisseria meningitidis, Acinetobacter spp, Aeromonas spp, Elizabethkingia meningoseptica, Chryseobacterium indologenes, Clostridium perfringens, Campylobacter jejuni, Campylobacter spp, Candida albicans Pathogens infrequently isolated, however ‘probable’ causes of young infant sepsis in literature |
| <b>Pathogens infrequently isolated, however ‘probable’ causes of young infant sepsis in literature:</b>                                                                                                                                                                                                                                                                                                                                                                                                                                                                                                                                                                    |
| Pseudomonas spp, Viridans streptococci (other than S.bovis), other streptococci, Enterococcus spp, Leuconostoc spp, Pediococcus spp, Clostridium spp, Brevundimonas spp, Plesiomonas shigelloides                                                                                                                                                                                                                                                                                                                                                                                                                                                                          |
| <b>Contaminants (Skin flora; environmental contaminants):</b>                                                                                                                                                                                                                                                                                                                                                                                                                                                                                                                                                                                                              |
| Staphylococcus spp (not aureus), Staphylococcus epidermidis, Staphylococcus saprophyticus, Corynebacterium spp, Pseudomonas stutzeri, Bacillus spp (other than Bacillus anthracis), Micrococcus spp, Diphtheroids, Propionibacterium spp, Aspergillus flavus                                                                                                                                                                                                                                                                                                                                                                                                               |

**Supplementary Table 4: Primary and secondary treatment outcomes by treatment arm among all randomized children**

|                                                                      |                                                  | Number (%) of children |                                           |                                           |
|----------------------------------------------------------------------|--------------------------------------------------|------------------------|-------------------------------------------|-------------------------------------------|
|                                                                      |                                                  | Arm A (N = 820)        | Arm B (N = 816)                           | Arm C (N = 817)                           |
| Treatment failure before by D8 visit                                 |                                                  | 97 (11.8%)             | 81 (9.9%)<br>RD = -1.9%<br>(-4.9%, 1.1%)  | 111 (13.6%)<br>RD = 1.8%<br>(-1.5%, 5.0%) |
| Initial reason for treatment failure                                 | Death                                            | 6                      | 5                                         | 7                                         |
|                                                                      | Hospitalisation                                  | 17                     | 15                                        | 24                                        |
|                                                                      | Clinical deterioration                           | 14                     | 14                                        | 18                                        |
|                                                                      | New sign on/after D3                             | 9                      | 11                                        | 3                                         |
|                                                                      | Persistence of sign(s) at D4                     | 26                     | 12                                        | 31                                        |
|                                                                      | Recurrence of signs on/after D5                  | 15                     | 15                                        | 19                                        |
|                                                                      | Persistence at D8                                | 0                      | 0                                         | 0                                         |
|                                                                      | SAE                                              | 1                      | 1                                         | 0                                         |
|                                                                      | Antibiotic change due to infectious co-morbidity | 9                      | 8                                         | 9                                         |
|                                                                      | Hospitalised during first week                   |                        | 28 (3.4%)                                 | 22 (2.7%)<br>RD = -0.7%<br>(-2.4%, 0.9%)  |
| Died during first week                                               |                                                  | 12 (1.5%)              | 10 (1.2%)<br>RD = -0.2%<br>(-1.4%, 0.9%)  | 13 (1.6%)<br>RD = 0.1%<br>(-1.1%, 1.3%)   |
| Died at any time before D15 follow-up                                |                                                  | 15 (1.8%)              | 12 (1.5%)<br>RD = -0.4%<br>(-1.6%, 0.9%)  | 16 (2.0%)<br>RD = 0.1%<br>(-1.2%, 1.4%)   |
| Number of children not classified as TF with follow-up on D11 or D15 |                                                  | N = 668                | N = 692                                   | N = 669                                   |
| Hospitalised during second week                                      |                                                  | 6 (1%)                 | 2 (<1%)                                   | 1 (<1%)                                   |
| Died during second week                                              |                                                  | 0                      | 1 (<1%)                                   | 2 (<1%)                                   |
| Non-fatal relapse during second week                                 |                                                  | 22 (3.3%)              | 10 (1.5%)<br>RD = -1.8%<br>(-3.5%, -0.2%) | 8 (1.2%)<br>RD = -2.1%<br>(3.7%, -0.5%)   |

**Figure 2: Frequency of pathogens in blood cultures (81/2067) of young infants with clinical severe disease enrolled in the SATT trial, Pakistan**

X axis shows absolute number of positive blood cultures (81 grew pathogens out of a total of 2067)

† Campylobacter and related organisms include 8 *C.jejuni*, 1 *C.upsaliensis*, 1 *C.coli*, 3 *Campylobacter* spp, and 5 BACTEC positive isolates that failed to grow on solid media but were positive for the 16SrRNA conserved region of the *Campylobacter/ Helicobacter/ Arcobacter* complex.

*Salmonella* spp include 2 *Salmonella* spp, 2 *Salmonella enterica* Group D, 1 *Salmonella Typhimurium*, and 1 *Salmonella choleraesuis-arizonae*

Pseudomonads include 2 *Pseudomonas* spp, 1 *Brevundimonas vesicularis*, 2 *Burkholderia cepacia*, 2 *Stenotrophomonas maltophilia*, 1 polymicrobial culture containing *Alcaligenes faecalis* and *Stenotrophomonas maltophilia*, 1 *P.aeruginosa*, 1 *Pseudomonas alcaligenes*, 1 *Pseudomonas luteola*, 1 *Weeksella virosa*, and 1 *Vibrio metschnikovii*

Other streptococci include 3 *Aerococcus viridans*, 3 *Streptococcus bovis*, 1 *Enterococcus faecium*, and 1 *Gemella morbillorum*

Enterobacteriaceae include 3 *E.coli*, 2 *Klebsiella pneumoniae*, 2 *Proteus mirabilis*, 1 *Plesiomonas shigelloides*, 1 *Serratia* spp, 1 *Enterobacter cloacae*, and 2 polymicrobial cultures comprising *Klebsiella pneumoniae* with *E.coli* and *Aeromonas* spp

Anaerobes include 2 *Clostridium perfringens*, and 1 *Bacteroides* spp

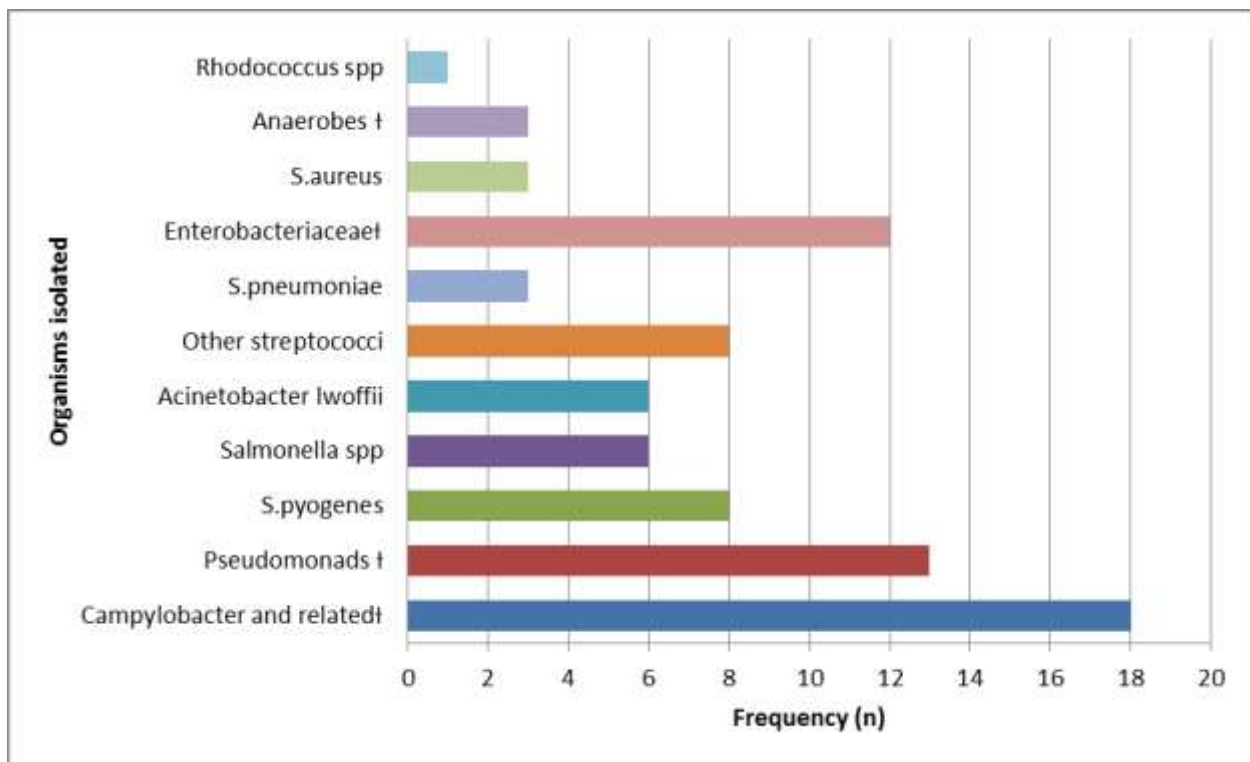

### **Panel 3: Per protocol analysis criteria<sup>11</sup>**

*Infants were included in the per protocol analysis provided they had received complete or partial clinical follow-up and were fully or partially treatment adherent*

#### **Adequacy of clinical follow-up**

- 1 **Complete follow-up:** Infant had a documented treatment failure and/or clinical follow-up was completed on all 8 days.
- 2 **Partial follow-up:** Infant had one or more days of follow-up missing, but follow-up was completed on assessment days 2-4 and on at least one of days 5-8, and vital status on day 8 was known (vital status may be ascertained retrospectively if day 8 visit was incomplete).

#### **Adequacy of Treatment adherence**

Fully Adherent: received 100% of doses of scheduled antibiotics on all 7 days or by the time of treatment failure (TF) if TF occurred and not known to have received any other antibiotic by study or non-study physician

Partially Adherent: received 100% of scheduled antibiotics on the first 3 days of therapy or by the time of TF, **and** at least 50% of all scheduled doses of each antibiotic on days 4-7 or by the time of treatment failure; **and** did not receive any non-study injectable antibiotic before day 8 assessment (unless given due to treatment failure) or any non-study oral antibiotic on days 1-3
